# Supplementary material for: Molecular insights into the interaction of the ribosomal stalk protein with elongation factor 1α
Source: PubMed Central journal article supplement — Nucleic Acids Res. 2014 Nov 26;42(22):14042–52. doi: 10.1093/nar/gku1248 (PMC4267659; doi:10.1093/nar/gku1248), 2014-11-26
Supplement: supp_gku1248_nar-02457-r-2014-File003.pdf [file supp_gku1248_nar-02457-r-2014-File003.pdf]

## **SUPPLEMENTARY DATA**

### **Molecular insights into the interaction of the ribosomal stalk protein with elongation factor 1 $\alpha$**

Kosuke Ito<sup>1,\*</sup>, Takayoshi Honda<sup>1</sup>, Takahiro Suzuki<sup>1</sup>, Tomohiro Miyoshi<sup>1</sup>, Ryo Murakami<sup>1</sup>, Min Yao<sup>2</sup>, and Toshio Uchiumi<sup>1,\*</sup>

<sup>1</sup> Department of Biology, Faculty of Science, Niigata University, 8050 Ikarashi 2-no-cho, Nishi-ku, Niigata 950-2181, Japan

<sup>2</sup> Faculty of Advanced Life Science, Hokkaido University, Kita-ku, Kita-10, Nishi-8, Sapporo 060-0810, Japan

\*To whom correspondence may be addressed. E-mail: [uchiumi@bio.sc.niigata-u.ac.jp](mailto:uchiumi@bio.sc.niigata-u.ac.jp); Tel & Fax: 025-262-7792 or [k-ito@bio.sc.niigata-u.ac.jp](mailto:k-ito@bio.sc.niigata-u.ac.jp); Tel & Fax: 025-262-7029

## SUPPLEMENTARY FIGURES

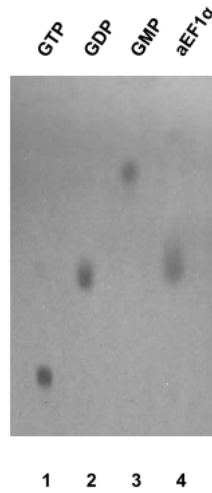

### **Supplementary Figure S1. Analysis of the bound nucleotide in purified EF1 $\alpha$ by thin-layer chromatography.**

An aliquot of 4 nmol of purified aEF1 $\alpha$  from *E. coli* was treated with phenol/chloroform to extract the bound nucleotide. The aqueous phase was recovered and spotted onto a polyethylenimine cellulose TLC plate. Aliquots of 4 nmol of GTP, GDP, and GMP standards were also spotted onto the TLC plate. A single spot was detected from the purified aEF1 $\alpha$ , and the mobility of this spot was consistent with that of the control GDP. Furthermore, the intensity of the spot from the purified aEF1 $\alpha$  was comparable to that of the GDP standard, whose amount was equal to that of the phenol/chloroform-treated aEF1 $\alpha$ . These facts indicate that the purified aEF1 $\alpha$  was predominantly in the GDP-bound form.

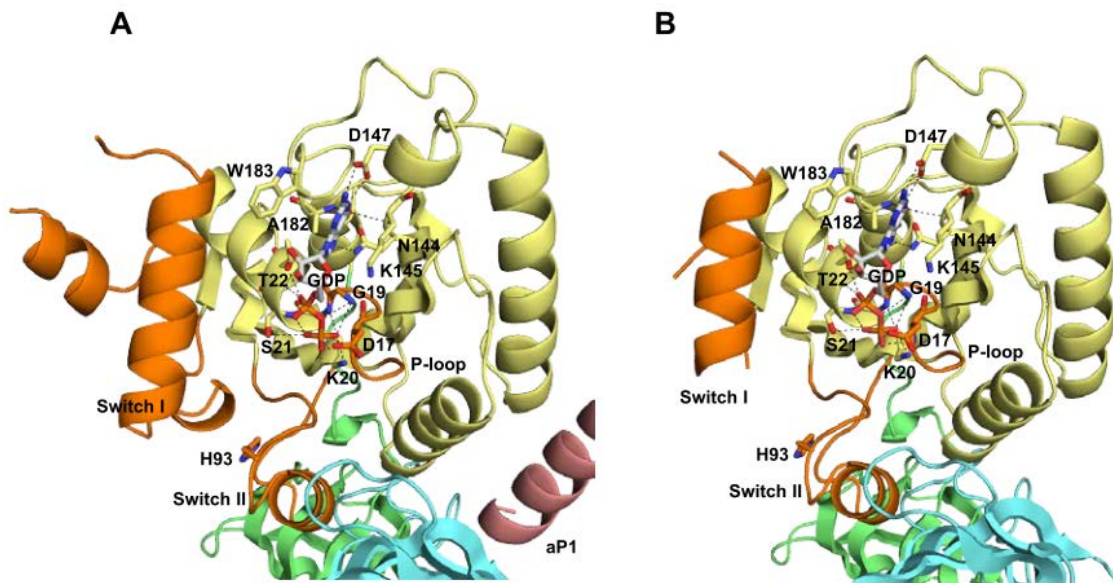

**Supplementary Figure S2. Structures of the key regions for GTP hydrolysis.**

(A) and (B) Structures of the key regions for GTP hydrolysis in the aP1(CTD)•aEF1 $\alpha$ •GDP complex (A) and in the aEF1 $\alpha$ •GDP complex (B). The molecules of aEF1 $\alpha$  are represented by a ribbon model, with the same color coding as in Figure. 1. The P-loops and switch I and II regions of aEF1 $\alpha$  are highlighted in orange. The bound molecules of GDP, the residues involved in GDP binding, and His93, a general base catalyst candidate, are shown with stick models. Hydrogen bonds are indicated by dashed lines.

Among the key regions for GTP hydrolysis, the GTP/GDP-binding region, the P-loop, and the switch II region exhibit quite similar conformations between the two structures. In contrast, in the switch I region, the disordered residues differ between the two structures. However, this could be the result of different crystal packing, and the conformations of the ordered regions are essentially the same.

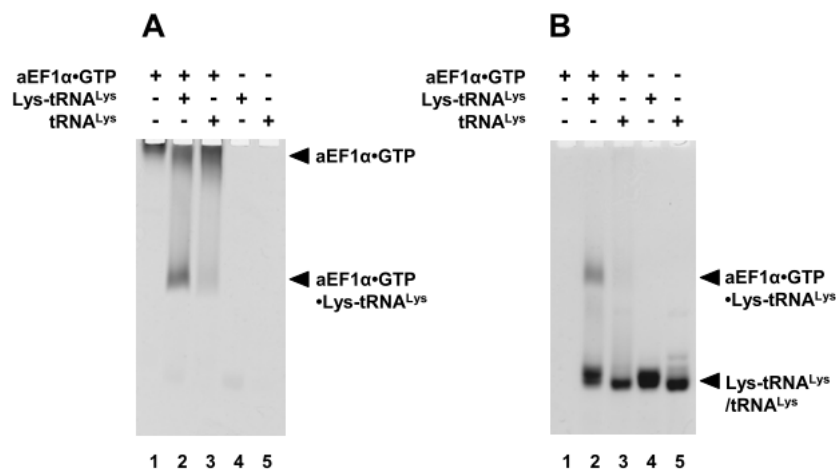

**Supplementary Figure S3. Analysis of the interaction between aEF1α and aminoacyl-tRNA.**

(A) and (B) Analysis of the interaction between aEF1α and aminoacyl-tRNA by gel mobility shift assay. An aliquot of 400 pmol of aEF1α•GTP was incubated with an equal amount of Lys-tRNA<sup>Lys</sup> (lane 2) or deacyl-tRNA<sup>Lys</sup> (lane 3), and subjected to a gel mobility shift assay as described under Materials and Methods. Aliquots of 400 pmol of aEF1α•GTP (lane 1), Lys-tRNA<sup>Lys</sup> (lane 4), and deacyl-tRNA<sup>Lys</sup> (lane 5) were also incubated alone and subjected to the gel mobility shift assay. The gel was stained with CBB (A) or Azur B (B). Note that the amount of tRNA<sup>Lys</sup> applied to lanes 2 and 4 was 667 pmol because 60.0% lysylated tRNA<sup>Lys</sup> was used.

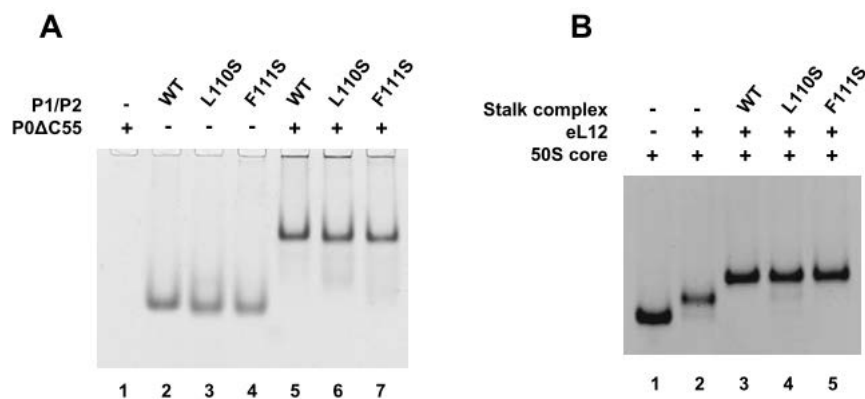

### Supplementary Figure S4. Preparation of the hybrid 50S subunits.

(A) Formation of the silkworm stalk complex. An aliquot of 100 pmol of silkworm P0 that lacked the C-terminal 55 amino acid residues (P0ΔC55; lane 1) and 200 pmol of each variant of the stalk dimer: P1(WT)•P2(WT) (lane 2), P1(L110S)•P2(L110S) (lane 3), and P1(F111S)•P2(F111S) (lane 4), were incubated together to produce the stalk complexes: P0ΔC55•[P1(WT)•P2(WT)]<sub>2</sub> (lane 5), P0ΔC55•[P1(L110S)•P2(L110S)]<sub>2</sub> (lane 6), and P0ΔC55•[P1(F111S)•P2(F111S)]<sub>2</sub> (lane 7), as described previously (35). Samples were subjected to native gel electrophoresis as described previously (17). (B) Formation of hybrid 50 S subunits composed of the *E. coli* 50S core and the silkworm stalk complex variants. An aliquot of 5 pmol of the *E. coli* 50S core that lacked the L10•L7/L12 stalk complex and L11 (lane 1) was incubated with 15 pmol of silkworm eL12 alone (lane 2), or the same amount of silkworm eL12 and 15 pmol of each silkworm stalk complex: P0ΔC55•[P1(WT)•P2(WT)]<sub>2</sub> (lane 3), P0ΔC55•[P1(L110S)•P2(L110S)]<sub>2</sub> (lane 4), and P0ΔC55•[P1(F111S)•P2(F111S)]<sub>2</sub> (lane 5), as described previously (47). These samples were analyzed by acrylamide-agarose composite gel electrophoresis as described previously (47,56). The gel was stained with Azur B.

|     | P-loop                                                                              | Switch I |    |
|-----|-------------------------------------------------------------------------------------|----------|----|
| Pho | MPK-----EKPHVNIIVFIGHVDHGKSTTIGRLLYDTGNIPEETIIKKFEE-MGEKGGK-SFKFAWVMDRLKEERERGITIDV |          | 73 |
| Ape | MA-----EKPHMNLVIVGHVDHGKSTLVGHLLYRLGYIEKKLKELEEQAASRGKESFKFAWILDKMKKEERERGITIDL     |          | 74 |
| Sso | MS-----QKPHLNLVIVGHIDHGKSTLVGRLLMDRGFIDEKTVKEAEEAAKLGKSEKFAFLDLRLKEERERGVITINL      |          | 74 |
| Sce | MGK-----EKSHINVVVIGHVDSGKSTTGHLLYKCGGIDKRTIEKFEKEAAELGKGSFKYAWVLDKDKAERERGITIDI     |          | 75 |
| Bmo | MGR-----EKTHINIVVIGHVDSGKSTTGHLLYKCGGIDKRTIEKFEKEAQMKGKGSFKYAWVLDKDKAERERGITIDI     |          | 75 |
| Hsa | MGR-----EKTHINIVVIGHVDSGKSTTGHLLYKCGGIDKRTIEKFEKEAAEMKGKGSFKYAWVLDKDKAERERGITIDI    |          | 75 |
| Eco | MSKEKFERTKPHVNVGTIGHVDHGKSTLTAALTVLA-----KTY-GGAARAFDQIDNAPEEKARGITINT              |          | 65 |
| Tth | MAKGEFIRTKPHVNVGTIGHVDHGKSTLTAALTVLA-----AENPNVEVKDYGDIDKAPERARGITINT               |          | 66 |
| Taq | MAKGEFIRTKPHVNVGTIGHVDHGKSTLTAALTVAA-----AENPNVEVKDYGDIDKAPERARGITINT               |          | 66 |

|     | Switch II                                                                        |     |
|-----|----------------------------------------------------------------------------------|-----|
| Pho | AHTKFETPHRYITIIDAPGHRDFVKNMITGASQADAALVVAATDGVN-----POTKEHAFIARTLGIKHIIIVTINKM   | 146 |
| Ape | TFMRFETKKYVFTIIDAPGHRDFVKNMITGASQADAALVVSARKGFEAGMSETEGOTREHLLARTMGIEQIIVAVNKM   | 154 |
| Sso | TFMRFETKKYVFTIIDAPGHRDFVKNMITGASQADAALVVSARKGFEAGMSETEGOTREHIIILAKTMGLDQIIVAVNKM | 154 |
| Sce | ALWKFETPKYQVTVIIDAPGHRDFIKNMITGTSQADCAILVAGVGFEEAGISKDGTREHALLAFTLGVRLIVAVNKM    | 155 |
| Bmo | ALWKFETSKYVTVIIDAPGHRDFIKNMITGTSQADCAVLVAAGTGEFEAGISKNGOTREHALLAFTLGVKQIIVGVNKM  | 155 |
| Hsa | SLWKFETSKYVTVIIDAPGHRDFIKNMITGTSQADCAVLVAAGVGEFEAGISKNGOTREHALLAYTLGVKQIIVGVNKM  | 155 |
| Eco | SHVEYDPTRHAYAVDPCGHADYVKNMITGAAQMDGAILVVAATDGVN-----POTREHILLGRQVGPYIIVFLNKC     | 138 |
| Tth | AHVEYETAKRHYSHVDCPGHADYIKNMITGAAQMDGAILVVAADGFM-----POTREHILLARQVGPYIIVVFMNKV    | 139 |
| Taq | AHVEYETAKRHYSHVDCPGHADYIKNMITGAAQMDGAILVVAADGFM-----POTREHILLARQVGPYIIVVFMNKV    | 139 |

|     |                                                                                  |     |
|-----|----------------------------------------------------------------------------------|-----|
| Pho | DMVN--YDQKVFEEKVKAQVEKLLKTLGYK--DFPVIPTSAWNGDNVVKKSDK---MPWYN-----GPTLIE         | 205 |
| Ape | DAPVNVYDQKRYEFVSVLKKFMKGLGYQVDKIPFIPVSAWGDNLIERSPN-----MPWYN-----GPTLVE          | 217 |
| Sso | DLTEPPYDEKRYKEIVDQVSKFMRSYGFNTKNVRFVVAAPAGDNITHRSEN-----MKWYN-----GPTLEE         | 217 |
| Sce | DSVK--WDESRFQEIIVKETSFNFIKKVGNPKTVFVPIISGWNNDNMIETATN-----APWYKGWKETKAGVVKGKTLLE | 228 |
| Bmo | DSTEPPISEPRFEEIKKEVSSYIKKIGYNPAAVAFVPIISGWHGDNMLEPSTK---MPWFKGWVERKEGKADGKSLIE   | 230 |
| Hsa | DSTEPPIYOKRYEEIVKEVSTYIKKIGYNPDTVAFVPIISGWNNDNMLEPSAN---MPWFKGWVTRKDGNSAGTLEL    | 230 |
| Eco | DMVD--DEELLELVEMEVRRELLSQYDFPGDDFPIVIRGSALKALE-----GDAEWEA-----KILELAG           | 194 |
| Tth | DMVD--DPELLDLVEMEVRDLLNQYDFPGDEVFPIIRGSALLALEQMRNPKTRRGNEWVD-----KIWELLD         | 205 |
| Taq | DMVD--DPELLDLVEMEVRDLLNQYDFPGDEVFPIIRGSALLALEEMHKNPKTRRGNEWVD-----KIWELLD        | 205 |

|     |                                                                                  |     |
|-----|----------------------------------------------------------------------------------|-----|
| Pho | ALDC-IPEPEKPIDKPLRIPIDQVYSIKGVGTVPVGRVETGKLVKGDVVI---FEPASTIFHKPIQGEVKSIEMHHEPLQ | 281 |
| Ape | ALDC-LQPPAKPVDKPLRIPVONVYSIPGAGTVPVGRVETGVLRVGDKV---FMPPG-----VVGVEVRSIEMHYQQLQ  | 287 |
| Sso | YLDQ-LLEPPKPVDPKPLRIPIDQVYSISGVGTVPVGRVETGVLKVGDKIV---FMPAG-----KVGEVRSIETHHTKMD | 287 |
| Sce | AIDA-IEQPSRPTDKPLRPLQDQVYKIGGIGTVPVGRVETGVIKPGMVVT---FAPAG-----VTTEVKSIVEMHHEQLE | 298 |
| Bmo | ALDA-ILPPARPTDKPLRPLQDQVYKIGGIGTVPVGRVETGVLKPGTIVV---FAPAN-----ITTEVKSIVEMHHEALQ | 300 |
| Hsa | ALDC-ILPPTRPTDKPLRPLQDQVYKIGGIGTVPVGRVETGVLKPGMVVT---FAPVN-----VTTEVKSIVEMHHEALS | 300 |
| Eco | FLDSYIPEPERAIDKPLLPIDVFSISGRGTVTVGRVERGIIKVGEEVEIVGI-KET-----QKSTCTGVEMFRKLLD    | 267 |
| Tth | AIDEYIPTFVRDVKPFLMPVEDVFTITGRGTVAAGRIERGKVKVGDVEIVGLAPET-----RKIVTVGVEMHRTKLQ    | 279 |
| Taq | AIDEYIPTFVRDVKPFLMPVEDVFTITGRGTVAAGRIERGKVKVGDVEIVGLAPET-----RKIVTVGVEMHRTKLQ    | 279 |

|     |                                                                                   |     |
|-----|-----------------------------------------------------------------------------------|-----|
| Pho | EALPGDNIGFNVGVSKNDIKRGDVAGHTD-KPPTVVRTKDTFKAQIIVLNHP-----EAITVGYSPVLHARTAQIPVRF   | 355 |
| Ape | QAEPGDNIGFAVRGVSKSDIKRGDVAGHLD-KPPT---VAEEFEARIFVIVHHP-----EAITVGYTPVIHVHTASVSSRI | 358 |
| Sso | KAEPGDNIGFNVGVKDKIKRGDVVGHFN-NPPT---VADEFTARIIVVWHF-----EALANGYFPVIHVHTASVACRV    | 358 |
| Sce | QGVPGDNVGFNVKNVSKVIRRGNVCGDAKNDPPK---GCASFNATVIVLNHP-----GQISAGYSFVLDCHTAHIACRF   | 370 |
| Bmo | EAVPGDNVGFNVKNVSKELRRGYVAGDSKNNDPPK---GAADFTAQVIVLNHP-----GQISNGYTPVLDCHTAHIACKF  | 372 |
| Hsa | EALPGDNVGFNVKNVSKDVRRGNVAGDSKNDPPM---EAAGFTAQVILNHP-----GQISAGYAPVLDCHTAHIACKF    | 372 |
| Eco | EGRAGENVGVLLRGVKEEIERGQVLAKPGITPK---HTKFESEVYIILSKDEGGRHTPFPGYRFPQYFRITDVTGTI     | 342 |
| Tth | EGIAGDNVGVLLRGVREEVERGQVLAKPGSITP---HTKFEASVYVLLKKEEGGRHTGFFSGYRFPQYFRITDVTGTIV   | 354 |
| Taq | EGIAGDNVGVLLRGVREEVERGQVLAKPGSITP---HTKFEASVYIILKKEEGGRHTGFFSGYRFPQYFRITDVTGTIV   | 354 |

|     |                                                                                  |     |
|-----|----------------------------------------------------------------------------------|-----|
| Pho | EQILAKVDPRITGNIVEENPQFIKTGDSAIIVLRFPMKPVVLEPVKEIPQLGRFAIRDMGMTIAAGMVISIQ-----    | 425 |
| Ape | IEIKAKLDPKTGQVVEQNPFQKAGDAIVRFKPKVPLVVEKFSIEIPQLGRFAMRDMNRITVIGIVTDVKPA-----     | 430 |
| Sso | SELVSKLDPRITGQEAENPQFLKQGDVAIVKFKPKIKPLCEKNEFPPLGRFAMRDMGKIVGVGIIIVDVKPA-----    | 430 |
| Sce | DELLEKNDRRSGGKLEDHPKFLKSGDAALVKFVPSKPMCVESFSEYFPLGRFAVRDMRQTVAVGVIKSVDKTEK-AAKVT | 449 |
| Bmo | AEIKKVDRRITGKSEVNPKSIKSGDAIVNLPKLCVESFQEFPLGRFAVRDMRQTVAVGVIKAVNKEAGGGKVT        | 452 |
| Hsa | AEIKKVDRRITGKSEVNPKSIKSGDAIVDMVPGKPMCVESFSEYFPLGRFAVRDMRQTVAVGVIKAVDKKAAGAGKVT   | 452 |
| Eco | -----ELPEGVEMVMPGDNIKVMVTLIHPAMDDG-----LRFAIREGGRITVGAGVVAKV-----                | 392 |
| Tth | -----QLPPGVEMVMPGDNVTFTVELIKPVALEEG-----LRFAIREGGRITVGAGVVTKI-----               | 404 |
| Taq | -----RLPQGVEMVMPGDNVTFTVELIKPVALEEG-----LRFAIREGGRITVGAGVVTKI-----               | 404 |

|     |              |     |
|-----|--------------|-----|
| Pho | -----KGE     | 428 |
| Ape | ---KVD- IKAK | 437 |
| Sso | ---K---VEIK  | 435 |
| Sce | KAAQK--AAKK  | 458 |
| Bmo | KAAEKAKKGGK  | 463 |
| Hsa | KSAQKA-QKAK  | 462 |
| Eco | -----LG      | 394 |
| Tth | -----LE      | 406 |
| Taq | -----LE      | 406 |

**Supplementary Figure S5. Amino acid sequence alignment of archaeal and eukaryotic EF1 $\alpha$  and EF-Tu.**

The sequences for archaeal aEF1 $\alpha$  from *Pyrococcus horikoshii* (Pho), *Aeropyrum pernix* (Ape), and *Sulfolobus solfataricus* (Sso), eukaryotic eEF1 $\alpha$  from *Saccharomyces cerevisiae* (Sce), *Bombyx mori* (Bmo), and *Homo sapiens* (Hsa), and bacterial EF-Tu from *Escherichia coli* (Eco), *Thermus thermophilus* (Tth), and *Thermotoga maritima* (Tma) were aligned and displayed as in Figure 4A. The black dots above the sequences indicate the residues that participated in the interaction with aP1 in *P. horikoshii*. The domain structure is indicated with colored bars, where yellow corresponds to domain 1, green to domain 2, and light blue to domain 3. The P-loop and switch I and II regions are also indicated in orange.

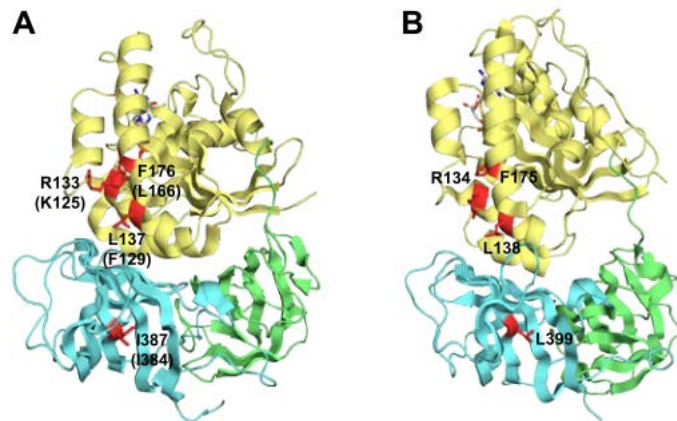

**Supplementary Figure S6. Mapping of the conserved amino acid residues of archaeal and eukaryotic EF1 $\alpha$  proteins involved in the binding with the stalk protein.**

(A) and (B) Mapping of the conserved amino acid residues on the structures. The amino acid residues of aEF1 $\alpha$  that participated in the binding with aP1 and are conserved between archaea and eukaryotes are indicated in red on aEF1 $\alpha$  (A). The corresponding amino acid residues in eukaryotes are indicated in red on eEF1 $\alpha$  (B). The color coding for the domains is the same as in Figure 1. To clarify the positional conservation of the amino acid residues, archaeal and eukaryotic EF1 $\alpha$ s that have a similar domain arrangement are shown as representatives of the respective EF1 $\alpha$ s: aEF1 $\alpha$  from *Aeropyrum pernix* in the aEF1 $\alpha$ •GTP•Pelota complex (PDB ID: 3AGJ) (54) is shown in (A); eEF1 $\alpha$  from *Saccharomyces cerevisiae* in the eEF1A•GDPNP•eEF1B $\alpha$  complex (PDB ID: 1G7C) (57) is shown in (B). The numbers of the corresponding amino acid residues in *P. horikoshii* aEF1 $\alpha$  are indicated in parentheses in (A).



**SUPPLEMENTARY TABLE****Table SI. Comprehensive list of the interactions between aP1 and aEF1 $\alpha$** 

| aP1 residue | aP1 atom | aEF1 $\alpha$ residue | aEF1 $\alpha$ atom | Distance ( $\text{\AA}$ ) |
|-------------|----------|-----------------------|--------------------|---------------------------|
| Glu96       | O        | Lys125                | NZ                 | 3.37                      |
| Leu100      | CD1      | Phe129                | CE1                | 3.68                      |
| Leu100      | CD1      | Phe129                | CZ                 | 3.84                      |
| Leu100      | CD1      | Leu166                | CD1                | 3.88                      |
| Leu103      | CB       | Phe129                | CE1                | 3.61                      |
| Leu103      | CB       | Phe129                | CZ                 | 3.76                      |
| Leu103      | CD1      | Lys125                | CB                 | 3.85                      |
| Leu103      | C        | Phe129                | CE2                | 3.82                      |
| Ser104      | CA       | Phe129                | CE2                | 3.78                      |
| Ala105      | O        | Lys324                | NZ                 | 2.95                      |
| Leu106      | CD1      | Leu359                | CB                 | 3.48                      |
| Leu106      | CD1      | Ala360                | CB                 | 3.85                      |
| Leu106      | CD1      | Ile384                | CG2                | 3.72                      |
| Leu106      | O        | Lys324                | NZ                 | 2.89                      |
| Phe107      | CB       | Phe129                | CD2                | 3.59                      |
| Phe107      | CG       | Phe129                | CD2                | 3.82                      |
| Phe107      | CD2      | Phe129                | CB                 | 3.61                      |
| Phe107      | CD2      | Phe129                | CG                 | 3.74                      |
| Phe107      | CD2      | Phe129                | CD2                | 3.67                      |
| Phe107      | CE1      | Ile384                | CD1                | 3.77                      |
| Phe107      | CE2      | Phe129                | CB                 | 3.77                      |
| Phe107      | O        | Arg132                | NH1                | 3.35                      |
| Gly108      | O        | Lys324                | NZ                 | 2.64                      |
| Gly108      | O        | Ser423                | OG                 | 2.66                      |
| Gly108      | OXT      | Ser423                | OG                 | 3.30                      |

## SUPPLEMENTARY REFERENCES

56. Tokimatsu,H., Strycharz,W.A. and Dahlberg,A.E. (1981) Gel electrophoretic studies on ribosomal proteins L7/L12 and the *Escherichia coli* 50 S subunit. *J. Mol. Biol.*, **152**, 397–412.
57. Andersen,G.R., Valente,L., Pedersen,L., Kinzy,T.G. and Nyborg,J. (2001) Crystal structures of nucleotide exchange intermediates in the eEF1A-eEF1Balpha complex. *Nat. Struct. Biol.*, **8**, 531–534.
